# Supplementary material for: Anti-Obesity Effects of Matoa (Pometia pinnata) Fruit Peel Powder in High-Fat Diet-Fed Rats
Source: MDPI journal article supplement (doi:10.3390/molecules26216733), 2021-11-07
Supplement: s1 [file s1]

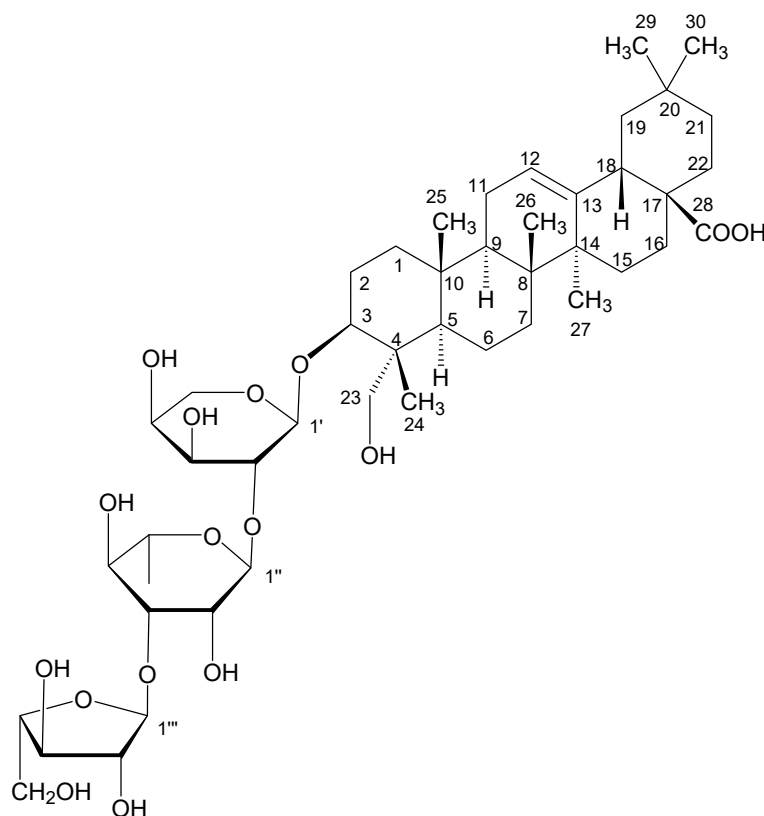

1

**Figure S2.** Chemical structure and data for 3-*O*-[ $\alpha$ -L-arabinofuranosyl-(1 $\rightarrow$ 3)- $\alpha$ -L-rhamnopyranosyl]-(1 $\rightarrow$ 2)- $\alpha$ -L-arabinopyranosyl]-hederagenin (**1**).

$^1\text{H}$  NMR ( $\text{CD}_3\text{OD}^\dagger$ , 600 MHz):  $\delta$  0.70 (s, 3H, Me-24), 0.80 (s, 3H, Me-26), 0.90 (s, 3H, Me-29), 0.93 (s, 3H, Me-30), 0.96 (s, 3H, Me-25), 1.12 (m, 1H, H-19a), 1.16 (s, 3H, Me-27), 1.23 (d,  $J=6.6$  Hz, Me-6''), 1.60 (m, 2H, H-1), 1.62 (m, 1H, H-9), 1.68 (t,  $J=13.2$  Hz, H-19b), 1.72 (m, 1H, H-2a), 1.84 (m, 1H, H-2b), 1.89 (m, 2H, H-11), 2.83 (dd,  $J=3.6, 13.8$  Hz, 1H, H-18), 3.31 (d,  $J=11.4$  Hz, 1H, H-23a), 3.38 (dd,  $J=9.0, 9.6$  Hz, 1H, H-4''), 3.58 (d,  $J=11.4$  Hz, 1H, H-23b), 3.61 (m, 1H, H-3), 3.70 (m, 1H, H-2'), 3.70 (m, 1H, H-3''), 3.83 (m, 1H, H-5''), 3.84 (m, 1H, H-3'''), 3.92 (s, 1H, H-2''), 3.95 (br s, 1H, H-4'''), 3.51 (ddd,  $J=1.8, 5.4, 12.6$  Hz, 1H, H-5'''a), 4.12 (d,  $J=2.4$  Hz, 1H, H-2'''), 4.18 (ddd,  $J=3.6,$

1

6.6, 8.4 Hz, 1H, H-4'), 4.49 (d,  $J=5.4$  Hz, 1H, H-1'), 5.01 (d,  $J=1.8$  Hz, 1H, H-1''), 5.09 (s, 1H, H-1'''), 5.23 (t,  $J=3.0$  Hz, 1H, H-12).

$^{13}\text{C}$  NMR ( $\text{CD}_3\text{OD}^\dagger$ , 150 MHz):  $\delta$  13.669 ( $\text{CH}_3$ , C-24), 16.379 ( $\text{CH}_3$ , C-25), 17.748 ( $\text{CH}_3$ , C-6''), 18.016 ( $\text{CH}_3$ , C-26), 18.772 ( $\text{CH}_2$ , C-6), 23.962 ( $\text{CH}_3$ , C-30), 24.048 ( $\text{CH}_2$ , C-16), 24.517 ( $\text{CH}_2$ , C-11), 26.442 ( $\text{CH}_3$ , C-27), 26.614 ( $\text{CH}_2$ , C-2), 28.816 ( $\text{CH}_2$ , C-16), 31.593 (C, C-20), 33.384 ( $\text{CH}_2$ , C-7), 33.556 ( $\text{CH}_3$ , C-29), 33.814 ( $\text{CH}_2$ , C-22), 34.877 ( $\text{CH}_2$ , C-21), 37.616 (C, C-10), 39.665 ( $\text{CH}_2$ , C-1), 40.498 (C, C-8), 42.729 (CH, C-18), 42.968 (C, C-14), 43.964 (C, C-4), 47.210 ( $\text{CH}_2$ , C-19), 47.621 (C, C-17), 48.048 (CH, C-9), 49.5 (CH, C-5), 63.258 ( $\text{CH}_2$ , C-5'''), 64.435 ( $\text{CH}_2$ , C-23), 65.306 ( $\text{CH}_2$ , C-5'), 69.605 (CH, C-4''), 69.605 (CH, C-5''), 71.520 (CH, C-2''), 72.008 (CH, C-4''), 73.741 (CH, C-3'), 75.819 (CH, C-2'), 79.046 (CH, C-3'''), 79.381 (CH, C-3''), 82.052, 82.895 (CH, C-2'''), 82.943 (CH, C-3), 86.935 (CH, C-4'''), 102.523 (CH, C-1''), 105.032 (CH, C-1'), 110.298 (CH, C-1'''), 123.626 (CH, C-12), 145.217 (C, C-13), 181.860 (C, C-28).

$^\dagger$  NMR spectra were calibrated from solvent resonance ( $\text{CH}_3\text{OH}$ : 3.3 for  $^1\text{H}$ ; 49.0 for  $^{13}\text{C}$ ).
